# Supplementary material for: Exosomal miRNA-128-3p from mesenchymal stem cells of aged rats regulates osteogenesis and bone fracture healing by targeting Smad5
Source: J Nanobiotechnology. 2020 Mar 16;18:47. doi: 10.1186/s12951-020-00601-w (PMC7077029; doi:10.1186/s12951-020-00601-w)
Supplement: Supplementary file 4 — Additional file 4. miRNA Array Analysis of Young and Aged Exos. [file 12951_2020_601_MOESM4_ESM.xlsx]

## Sheet: Sheet1
tracking_id	Y1	Y2	Y3	A1	A2	A3	P value
rno-miR-148a-3p	552490	354573	569268	359726	369001	346425	0.125659
rno-miR-143-3p	66254.6	63391.8	68446.3	65027.5	65687.1	63060.4	0.435492
rno-miR-24-3p	48858.2	56122	50527.9	52219.6	58114.4	50745.2	0.58665
rno-miR-99a-5p	29694.1	27934	30788.9	44570.5	41440.4	43390.2	0.000379413
rno-miR-122-5p	21845.1	33817.8	22704.5	44392.6	34880.9	43219.2	0.0394361
rno-miR-128-3p	6774.22	8925.47	7181.45	25912.2	26753.3	25449.5	1.7423e-05
rno-miR-26a-5p	9884.15	7907.32	10384.7	22552.1	21898.1	22218.7	7.97589e-05
rno-let-7f-5p	23011.4	15281.8	23905.7	21524.3	19572.8	21230.4	0.988536
rno-let-7i-5p	12640.5	9049.17	13223.8	18816.5	9804.49	18626.8	0.274128
rno-let-7c-5p	8680.78	10990.3	9145.2	18085.2	12030.6	17923.6	0.0386854
rno-miR-7a-5p	3470.91	5452.34	3779.04	17452.7	17183.4	17315.4	2.99031e-05
rno-miR-21-5p	23961.2	15510.1	24884	15733.1	15810.4	15662	0.127804
rno-miR-125b-5p	3121.73	4415.16	3419.38	14151.9	14131.7	14141.6	1.14922e-05
rno-miR-320-3p	9714.37	12979	10209.8	13875.2	14311.2	12410.5	0.0929319
rno-miR-151-3p	9309.31	12122.7	9792.59	12847.4	13329.1	11492.9	0.104822
rno-let-7a-5p	8156.99	8116.66	8605.7	11463.8	9180.52	10257.5	0.0414887
rno-let-7g-5p	11579	6851.1	12130.4	11404.5	10346.1	10204.6	0.800047
rno-miR-27b-3p	4867.66	6289.7	5217.69	10949.9	9955.84	9798.71	0.00103231
rno-miR-30d-5p	6606.61	5766.35	7008.81	9586.12	8785	8581.04	0.006153
rno-miR-126a-3p	900.9	2198.06	1131.93	9546.59	8751.06	8545.74	0.0001153
rno-miR-181a-5p	9735.32	6089.87	10231.4	9052.46	8326.84	8104.55	0.893339
rno-miR-199a-3p	6341.22	4567.41	6735.46	8499.03	7851.71	7610.42	0.0426286
rno-miR-140-3p	6292.34	7736.04	6685.11	7451.48	6952.37	6675.11	0.814851
rno-miR-378a-3p	9819.12	7317.36	10317.7	7392.18	6901.46	6622.16	0.0846157
rno-miR-100-5p	2388.43	3083	2664.08	6799.23	6392.4	6092.74	0.000206744
rno-miR-30c-5p	1243.1	1579.57	1484.39	6048.14	5747.58	5422.12	3.14112e-05
rno-miR-423-5p	3701.38	6527.58	4016.42	5988.85	5696.68	5369.19	0.362516
rno-let-7b-5p	3212.51	3825.2	3512.89	5929.56	5645.78	5316.25	0.00107853
rno-miR-218a-5p	8869.33	5966.18	9339.41	5672.61	5425.18	5086.83	0.0672752
rno-miR-99b-5p	3275.37	3663.44	3577.63	5593.55	5357.31	5016.24	0.000891225
rno-miR-10b-5p	3994.69	3330.4	4318.53	4980.83	5652.52	5323.26	0.014698
rno-miR-30a-5p	6124.73	2635.78	6512.47	4506.46	5213.94	4867.13	0.863804
rno-miR-1b	118.72	323.528	126.912	3933.27	4459.76	4315.99	1.88117e-05
rno-miR-423-3p	3170.61	3530.22	2721.02	3735.62	4501.25	4125.94	0.0382148
rno-miR-23a-3p	4790.84	3197.18	4098.21	3676.33	4446.44	4068.93	0.94857
rno-miR-25-3p	5454.29	3939.38	4662.15	3537.97	4318.51	3935.89	0.2
rno-miR-9a-5p	984.71	1512.95	863.004	3537.97	3696.71	3935.89	0.00035074
rno-miR-146b-5p	3205.53	1779.38	2750.7	3399.61	4190.59	3802.86	0.0634809
rno-miR-27a-3p	3855.02	3349.43	3302.77	3379.85	4172.32	3783.86	0.393451
rno-miR-181b-5p	4399.75	2788.02	3765.79	3162.43	3971.31	3574.8	0.883629
rno-miR-191a-5p	2123.05	1608.1	1830.59	3142.67	3953.04	3555.8	0.00362016
rno-miR-23b-3p	1319.92	1617.62	1147.93	3024.07	3843.38	3441.76	0.00161879
rno-miR-125b-1-3p	1047.56	2378.86	916.426	2865.95	3697.19	3289.72	0.0249602
rno-miR-199a-5p	1906.56	1322.65	1646.58	2707.83	2858.18	3137.68	0.00375169
rno-miR-152-3p	2975.07	2692.86	2554.81	2510.18	3368.26	2947.63	0.507848
rno-miR-29a-3p	1836.72	1998.24	1587.21	2490.41	3349.99	2928.62	0.0154742
rno-miR-328a-3p	1431.66	1903.09	1242.91	2470.65	3331.72	2909.62	0.0121502
rno-miR-103-3p	488.86	903.968	441.531	2450.88	2598.64	2890.62	0.000482054
rno-miR-22-3p	1752.92	1313.13	1515.98	2332.29	2478.85	2776.59	0.00534311
rno-miR-125a-5p	670.44	989.608	595.874	2273	2418.96	2719.58	0.000650907
rno-miR-26b-5p	377.12	599.472	346.552	2114.88	2108.29	2159.54	3.19219e-05
rno-miR-214-3p	2807.46	2645.29	2412.34	2095.11	2592.2	2140.53	0.152127
rno-miR-127-3p	265.38	589.96	251.573	1996.28	1986.02	2045.5	0.000126816
rno-miR-148b-3p	2150.99	1969.7	1854.34	1976.52	2482.56	2026.5	0.404297
rno-miR-92a-3p	2095.12	1303.62	1806.85	1976.52	2119.48	2026.5	0.26334
rno-miR-149-5p	2213.84	2036.3	1907.76	1877.69	2391.18	1931.47	0.942888
rno-miR-3473	2500.17	4928.99	2151.14	1838.16	2354.64	1893.46	0.260247
rno-let-7d-3p	1298.97	1275.06	1130.12	1660.28	1800.05	1722.42	0.00176464
rno-miR-676	726.31	1179.91	643.363	1521.92	1660.29	1589.38	0.0124524
rno-let-7d-5p	398.07	589.96	364.359	1423.09	1395.1	1494.36	0.000205371
rno-miR-139-5p	244.43	380.616	233.766	1403.33	1894.22	1475.36	0.00123629
rno-miR-129-5p	1312.94	808.808	1142	1383.56	1520.54	1456.35	0.075503
rno-miR-24-2-5p	2430.34	1960.18	2091.79	1205.68	1769.87	1285.31	0.0302478
rno-miR-224-5p	642.5	589.96	572.125	1106.85	1069.08	1190.28	0.000234014
rno-miR-451-5p	251.41	466.256	239.698	1106.85	1069.08	1190.28	0.00060637
rno-miR-101a-3p	467.91	418.68	423.724	1087.09	1332.44	1579.28	0.00330319
rno-miR-145-5p	265.38	171.28	251.573	1047.56	1190.41	1541.27	0.0023285
rno-let-7e-5p	810.11	456.744	714.593	988.26	1123.02	1020.02	0.027559
rno-miR-133a-3p	20.95	142.728	43.8075	988.26	1123.02	1020.02	6.0597e-05
rno-miR-221-3p	1194.22	656.568	1041.09	869.67	824.567	885.261	0.55294
rno-miR-322-3p	893.92	951.544	785.832	770.84	901.626	772.955	0.394689
rno-miR-378b	677.42	685.112	601.807	770.84	901.626	772.955	0.0342148
rno-miR-9a-3p	160.63	142.728	162.535	770.84	739.68	772.955	1.07374e-06
rno-miR-183-5p	111.74	123.704	120.979	751.08	719.309	750.5	6.09632e-07
rno-miR-182	76.82	85.64	91.297	751.08	719.309	750.5	5.29773e-07
rno-miR-192-5p	845.03	485.288	744.275	731.31	698.928	728.034	0.80832
rno-miR-204-5p	83.8	190.312	97.23	731.31	698.928	728.034	7.01996e-05
rno-miR-30e-5p	195.54	152.248	192.209	691.78	658.175	683.114	8.43858e-06
rno-miR-532-5p	775.19	837.36	684.912	672.02	801.808	660.659	0.439243
rno-miR-28-3p	872.97	723.176	768.024	672.02	801.808	660.659	0.293747
rno-miR-351-5p	293.32	361.584	275.322	672.02	810.677	660.659	0.00181228
rno-miR-486	139.67	285.464	144.719	672.02	663.265	660.659	0.000578924
rno-miR-674-3p	412.04	732.688	376.234	652.25	781.838	638.193	0.207044
rno-miR-361-3p	356.17	418.68	328.745	652.25	780.797	638.193	0.00358471
rno-miR-499-5p	97.77	161.76	214.64	573.19	542.531	548.352	0.000348427
rno-miR-10a-5p	90.79	95.152	114.728	573.19	542.531	548.352	2.84538e-06
rno-miR-16-5p	146.66	142.728	186.092	533.66	504.977	503.432	3.07468e-05
rno-miR-222-3p	384.11	399.648	571.472	513.89	486.195	480.966	0.528858
rno-miR-219a-2-3p	41.9	209.336	286.004	513.89	486.195	480.966	0.0124286
rno-miR-146a-5p	258.4	123.704	157.556	513.89	486.195	480.966	0.00167336
rno-miR-30b-5p	62.85	114.184	143.276	494.13	467.423	458.511	0.000143166
rno-miR-145-3p	300.3	342.552	485.828	474.36	372.588	436.045	0.463367
rno-miR-338-5p	48.89	114.184	143.276	474.36	392.506	436.045	0.000814986
rno-miR-30a-3p	551.71	352.072	500.108	454.6	482.076	413.591	0.790871
rno-miR-345-3p	265.38	314.008	443.012	434.83	314.456	391.125	0.569796
rno-miR-140-5p	188.56	180.792	243.188	434.83	314.456	391.125	0.0119916
rno-miR-708-3p	907.88	989.608	1456.41	415.07	285.397	368.67	0.0121434
rno-miR-186-5p	223.48	171.28	228.92	415.07	285.397	368.67	0.0243885
rno-miR-455-5p	419.02	218.856	300.284	395.3	256.324	346.205	0.793112
rno-miR-34b-3p	251.41	342.552	485.828	375.54	227.265	323.75	0.562008
rno-miR-450a-5p	230.46	142.728	186.092	375.54	227.265	323.75	0.0716405
rno-miR-107-3p	62.85	95.152	114.728	375.54	227.265	323.75	0.00905443
rno-miR-361-5p	153.64	152.248	186.957	356.83	400.268	352.081	0.000421218
rno-miR-22-5p	523.78	485.288	699.932	355.77	294.773	301.284	0.0214658
rno-miR-101b-3p	551.71	428.192	614.288	355.77	332.708	301.284	0.0240046
rno-miR-466b-3p	223.48	580.44	842.66	336.01	274.402	278.83	0.234558
rno-miR-1-3p	13.97	28.544	14.816	336.01	213.852	278.83	0.0019497
rno-miR-130a-3p	663.45	352.072	500.108	316.24	272.964	256.364	0.0714925
rno-miR-342-3p	188.56	266.432	371.648	316.24	225.99	256.364	0.88238
rno-miR-185-5p	160.63	114.184	139.43	316.24	331.34	256.364	0.00354494
rno-miR-338-3p	76.82	104.672	129.008	316.24	331.34	256.364	0.00195556
rno-miR-379-5p	34.92	28.544	20.6048	316.24	331.34	256.364	0.000300474
rno-miR-503-3p	251.41	256.92	337.476	296.48	312.698	233.909	0.981505
rno-miR-298-5p	370.14	218.856	284.663	296.48	312.698	233.909	0.848301
rno-miR-34c-5p	258.4	104.672	126.232	296.48	312.698	233.909	0.0931607
rno-miR-411-5p	62.85	104.672	126.232	296.48	312.698	233.909	0.00382006
rno-miR-99b-3p	307.28	285.464	377.081	276.71	294.047	211.443	0.16945
rno-miR-495	62.85	95.152	113.023	276.71	248.094	263.148	0.000515176
rno-miR-409a-3p	167.61	95.152	113.023	256.95	275.406	241.214	0.00518629
rno-miR-17-5p	125.7	66.608	73.4186	256.95	275.406	241.214	0.00131433
rno-miR-1839-5p	293.32	380.616	423.889	249.78	242.23	233.256	0.0326097
rno-miR-125b-2-3p	258.4	209.336	271.454	237.18	256.755	219.27	0.711274
rno-miR-30e-3p	97.77	142.728	179.035	237.18	199.389	219.27	0.0384162
rno-miR-98-5p	139.67	123.704	152.639	237.18	256.755	219.27	0.00193089
rno-miR-370-3p	20.95	76.12	86.6165	237.18	256.755	219.27	0.00156662
rno-miR-181d-5p	104.76	76.12	86.6165	237.18	256.755	219.27	0.000407991
rno-miR-142-5p	34.92	38.064	33.8138	237.18	256.755	219.27	4.9748e-05
rno-miR-126a-5p	27.93	9.512	27.1979	237.18	251.848	219.27	4.3445e-05
rno-miR-412-5p	132.69	152.248	192.244	217.42	229.58	197.65	0.0481565
rno-miR-132-3p	244.43	95.152	113.023	217.42	237.18	197.65	0.241359
rno-miR-106b-3p	132.69	19.032	33.4069	217.42	229.58	197.65	0.0142787
rno-miR-1843b-5p	237.45	161.76	205.442	197.66	229.59	197.66	0.795541
rno-miR-200a-3p	13.97	85.64	117.851	197.65	194.875	197.65	0.0155409
rno-miR-450b-5p	111.74	66.608	98.1058	197.65	165.271	175.392	0.00604043
rno-miR-323-3p	69.84	28.544	58.6144	197.65	165.271	175.392	0.00123558
rno-miR-1843a-5p	146.66	95.152	127.72	166.52	165.511	177.185	0.039773
rno-miR-34c-3p	167.61	123.704	157.343	158.12	106.913	131.513	0.431157
rno-miR-29b-3p	69.84	57.088	88.2288	158.12	156.607	131.513	0.00351534
rno-miR-542-5p	174.59	237.888	275.809	138.36	135.662	109.58	0.0303588
rno-miR-503-5p	300.3	180.792	216.572	138.36	135.662	109.58	0.0458505
rno-miR-542-3p	132.69	133.216	167.212	138.36	135.662	109.58	0.322924
rno-miR-330-3p	34.92	104.672	137.597	138.36	135.662	151.111	0.182817
rno-miR-340-5p	13.97	104.672	12.4775	138.36	135.662	151.111	0.0336572
rno-miR-382-3p	6.98	28.544	7.235	138.36	135.662	151.111	0.000120035
rno-miR-363-3p	13.97	19.032	48.7457	138.36	135.662	151.111	0.000642073
rno-miR-143-5p	13.97	19.032	12.4775	138.36	135.662	151.111	1.64093e-05
rno-miR-133b-3p	0	9.512	38.8687	138.36	17.835	109.58	0.130521
rno-miR-409a-5p	6.98	9.512	7.235	138.36	17.835	151.111	0.0900256
rno-miR-200c-3p	6.98	0	7.235	138.36	130.84	151.111	2.90566e-05
rno-miR-378a-5p	6.98	0	7.235	138.36	130.84	151.111	2.90566e-05
rno-miR-425-5p	216.5	190.312	226.449	130.84	66.6391	101.232	0.0065265
rno-miR-760-3p	69.84	161.76	196.826	130.84	66.6391	101.232	0.363095
rno-miR-434-5p	6.98	85.64	7.235	130.84	127.69	144.148	0.0193292
rno-miR-93-5p	111.74	76.12	107.975	130.84	127.69	144.148	0.0450828
rno-miR-206-3p	13.97	123.704	157.343	118.94	49.0711	88.0234	0.799094
rno-miR-124-3p	55.87	47.576	78.3601	118.94	49.0711	88.0234	0.327636
rno-miR-434-3p	6.98	76.12	7.235	118.94	115.076	133.13	0.0175191
rno-miR-664-3p	41.9	0	33.425	118.6	130.84	132.815	0.00164434
rno-miR-3559-3p	195.54	142.728	148.655	118.59	267.615	132.806	0.842114
rno-miR-208b-3p	27.93	57.096	22.9475	144	107.055	225.99	0.0285676
rno-miR-466c-5p	69.84	38.064	54.38	144	71.37	166.52	0.0720748
rno-miR-138-5p	0	38.056	0	144	71.355	130.84	0.016168
rno-miR-541-5p	13.97	28.544	12.4775	144	53.52	130.84	0.0336423
rno-miR-487b-3p	6.98	28.544	7.235	118.59	53.52	132.806	0.0263868
rno-miR-195-5p	20.95	19.032	17.7125	118.59	35.685	132.806	0.0651031
rno-miR-7b	13.97	19.032	12.4775	118.59	35.685	132.806	0.0567661
rno-miR-652-3p	13.97	19.032	12.4775	118.59	35.685	132.806	0.0567661
rno-miR-150-5p	13.97	19.032	12.4775	118.59	95.16	132.806	0.000844452
rno-miR-337-5p	0	19.032	0	118.59	95.16	132.806	0.000999208
rno-miR-125a-3p	244.43	199.824	236.317	107.05	107.05	74.8255	0.00169695
rno-miR-200b-3p	27.93	38.064	68.4914	107.05	102.473	74.8255	0.0341753
rno-miR-20a-5p	76.82	85.64	59.615	98.83	428.2	114.509	0.263411
rno-miR-196a-5p	62.85	85.64	49.1375	98.83	428.2	107.05	0.252755
rno-miR-433-3p	20.95	66.608	17.7125	98.83	79.064	107.05	0.0283696
rno-miR-484	55.87	47.576	43.9025	98.83	107.05	114.509	0.000554203
rno-miR-543-3p	27.93	47.576	22.9475	98.83	178.41	114.509	0.0184905
rno-miR-96-5p	0	47.576	62.0474	98.83	107.05	178.41	0.04367
rno-miR-300-3p	0	28.544	42.4268	98.83	107.05	95.15	0.00410242
rno-miR-28-5p	41.9	19.032	33.425	98.83	95.16	114.509	0.00132847
rno-miR-429	20.95	19.032	17.7125	98.83	95.16	114.509	0.000154611
rno-miR-504	6.98	9.512	7.235	98.83	47.56	114.509	0.0174312
rno-miR-134-5p	6.98	0	0	98.83	108.238	114.509	3.34559e-05
rno-let-7c-2-3p	195.54	190.304	209.19	79.06	77.311	96.2037	0.000157931
rno-let-7a-1-3p	195.54	190.304	209.19	79.06	77.311	96.2037	0.000157931
rno-miR-196b-5p	293.32	161.76	179.763	79.06	77.311	96.2037	0.0376029
rno-miR-339-3p	41.9	85.64	101.289	79.06	46.384	74.013	0.657397
rno-miR-374-5p	41.9	38.064	52.2412	79.06	30.927	74.013	0.337231
rno-miR-421-3p	83.8	28.544	42.4268	79.06	30.927	96.2037	0.540358
rno-miR-155-5p	62.85	28.544	42.4268	79.06	15.457	74.013	0.637305
rno-miR-455-3p	62.85	28.544	42.4268	79.06	95.15	74.013	0.0321497
rno-miR-382-5p	27.93	28.544	42.4268	79.06	95.15	74.013	0.0033025
rno-miR-410-3p	6.98	9.512	22.8062	79.06	95.15	74.013	0.00097931
rno-miR-152-5p	20.95	0	0	79.06	262.86	74.013	0.10295
rno-miR-671	13.97	0	13.97	79.06	139.165	74.013	0.0147401
rno-miR-330-5p	27.93	38.064	52.2412	76.82	29.4876	59.3	0.366235
rno-miR-194-5p	41.9	28.544	42.4268	62.85	0	59.3	0.889425
rno-miR-466b-5p	0	0	0	59.31	46.384	53.2755	0.000143187
rno-miR-466c-3p	55.87	142.728	160.142	59.3	78.6364	53.265	0.167286
rno-miR-204-3p	90.79	76.12	91.4742	59.3	58.9835	53.265	0.00576111
rno-let-7f-1-3p	55.87	57.096	71.8619	59.3	58.9835	53.265	0.466041
rno-miR-351-3p	27.93	57.096	71.8619	59.3	49.1488	59.3	0.799572
rno-miR-365-3p	55.87	47.576	62.0474	59.3	39.3223	53.265	0.565553
rno-miR-210-3p	69.84	38.064	52.2412	59.3	39.3223	53.265	0.813572
rno-miR-129-1-3p	34.91	38.064	52.2412	59.3	29.4876	59.3	0.536048
rno-miR-874-3p	20.95	28.544	42.4268	59.3	35.68	59.3	0.108089
rno-miR-375-3p	6.98	19.032	32.6206	59.3	35.68	53.265	0.0434864
rno-miR-494-3p	6.98	19.032	32.6206	59.3	35.68	59.3	0.041989
rno-miR-1298	6.98	19.032	32.6206	59.3	19.6612	59.3	0.154593
rno-miR-708-5p	0	19.032	32.6206	59.3	9.82645	59.3	0.249511
rno-miR-329-5p	6.98	9.512	22.8062	59.3	9.82645	59.3	0.1593
rno-miR-485-3p	6.98	9.512	22.8062	59.3	9.82645	59.3	0.1593
rno-miR-6328	0	9.512	22.8062	59.3	9.82645	71.37	0.145059
rno-miR-493-3p	0	9.512	22.8062	59.3	69.84	59.47	0.00222921
rno-miR-15b-3p	34.92	0	0	59.3	71.37	47.58	0.0241202
rno-miR-195-3p	20.95	0	20.95	59.3	47.58	47.58	0.00938514
rno-miR-668	0	0	11.89	59.3	39.53	47.58	0.00301099
rno-miR-497-5p	0	0	11.89	59.3	47.58	35.68	0.00524928
rno-miR-1249	0	0	0	59.3	47.58	59.3	0.000143642
rno-miR-130b-3p	34.92	28.544	42.4268	55.87	137.62	59.3	0.143909
rno-miR-296-3p	69.84	104.672	120.909	39.53	30.355	19.77	0.0130798
rno-miR-501-3p	90.79	57.096	71.8619	39.53	22.9213	39.53	0.0248782
rno-miR-181a-1-3p	13.97	38.064	52.2412	39.53	19.9475	39.53	0.898602
rno-miR-335	90.79	28.544	42.4268	39.53	18.46	39.53	0.347398
rno-miR-872-5p	41.9	28.544	42.4268	39.53	18.46	39.53	0.573757
rno-miR-148a-5p	20.95	28.544	42.4268	39.53	18.46	39.53	0.852708
rno-miR-326-3p	13.97	28.544	42.4268	39.53	18.46	19.77	0.833563
rno-miR-383-5p	0	28.544	42.4268	39.53	18.46	53.7526	0.447625
rno-miR-3559-5p	34.92	19.032	32.6206	39.53	16.9737	53.7526	0.540092
rno-miR-1306-3p	27.93	19.032	32.6206	39.53	16.9737	53.7526	0.421412
rno-miR-450b-3p	41.9	0	13.96	39.53	35.68	39.53	0.188196
rno-miR-30c-2-3p	27.93	0	27.93	39.53	28.6982	33.4077	0.195331
rno-miR-136-3p	13.97	0	27.93	39.53	14	33.4077	0.249248
rno-miR-341	6.98	0	13.97	39.53	14	33.4077	0.0645439
rno-miR-34b-5p	6.98	0	13.97	39.53	23.79	39.53	0.0145478
rno-miR-299a-3p	0	0	0	39.53	23.79	19.77	0.0100794
rno-miR-299b-3p	0	0	0	39.53	23.79	39.53	0.00283408
rno-miR-448-3p	0	0	0	39.53	11.89	39.53	0.0302007
rno-miR-339-5p	0	0	0	39.53	36.6181	37.9417	1.43546e-06
rno-miR-151-5p	6.98	19.032	32.6206	35.68	16.9737	49.7835	0.292215
rno-miR-490-3p	0	19.032	32.6206	35.68	16.9737	39.53	0.314235
rno-miR-493-5p	6.98	9.512	22.8062	23.79	15.4863	39.53	0.200056
rno-miR-628	0	9.512	22.8062	23.79	15.4863	39.53	0.184203
rno-miR-452-5p	48.89	0	0	23.79	35.68	39.53	0.380732
rno-miR-92b-3p	34.92	28.544	42.4268	20.95	88.4711	59.3	0.353244
rno-miR-505-3p	0	85.64	147.396	19.77	35.68	19.77	0.288935
rno-miR-34a-5p	48.89	47.576	68.8202	19.77	35.68	21.475	0.0259335
rno-miR-187-3p	27.93	47.576	68.8202	19.77	27.735	21.475	0.105569
rno-let-7b-3p	34.92	38.064	55.4607	19.77	21.79	21.475	0.0273537
rno-miR-32-5p	20.95	38.064	0	19.77	21.79	18.724	0.971259
rno-miR-6324	55.87	28.544	42.0899	19.77	15.84	21.475	0.0454743
rno-miR-184	48.89	28.544	42.0899	19.77	22.8958	21.475	0.0379367
rno-miR-369-3p	27.93	28.544	42.0899	19.77	15.84	21.475	0.0481095
rno-miR-6329	13.97	28.544	13.97	19.77	15.84	18.724	0.892917
rno-miR-485-5p	6.98	28.544	57.0546	19.77	17.4688	18.724	0.447801
rno-miR-365-5p	6.98	28.544	57.0546	19.77	15.84	18.724	0.430379
rno-miR-27a-5p	48.89	19.032	32.6206	19.77	9.895	21.475	0.153172
rno-miR-212-3p	62.85	19.032	28.7303	19.77	9.895	21.475	0.223361
rno-miR-129-2-3p	27.93	19.032	28.7303	19.77	9.895	21.475	0.160892
rno-miR-212-5p	27.93	19.032	28.7303	19.77	22.8958	21.475	0.299972
rno-miR-331-3p	20.95	19.032	0	19.77	9.895	21.475	0.650137
rno-miR-872-3p	13.97	19.032	13.97	19.77	9.895	18.724	0.900787
rno-miR-532-3p	6.98	19.032	42.0039	19.77	9.895	18.724	0.575319
rno-miR-324-3p	6.98	19.032	42.0039	19.77	22.6448	19.77	0.859745
rno-miR-222-5p	0	19.032	42.0039	19.77	22.6448	19.77	0.976426
rno-miR-203b-3p	34.92	9.512	15.3596	19.77	9.3168	21.475	0.737781
rno-miR-29c-3p	13.97	9.512	13.97	19.77	9.3168	18.724	0.396637
rno-miR-211-5p	13.97	9.512	13.97	19.77	9.3168	18.724	0.396637
rno-let-7g-3p	13.97	9.512	13.97	19.77	9.3168	18.724	0.396637
rno-miR-135a-5p	6.98	9.512	26.9406	19.77	9.3168	18.724	0.847187
rno-miR-193b-5p	6.98	9.512	26.9406	19.77	9.3168	18.724	0.847187
rno-miR-130b-5p	6.98	9.512	26.9406	19.77	9.3168	19.77	0.813511
rno-miR-144-5p	0	9.512	26.9406	19.77	9.3168	19.77	0.656641
rno-miR-20b-5p	0	9.512	0	19.77	9.3168	19.77	0.0496226
rno-miR-411-3p	0	9.512	0	19.77	9.3168	19.77	0.0496226
rno-miR-3068-5p	20.95	0	0	19.77	18.0925	21.475	0.143762
rno-miR-31a-5p	20.95	0	20.95	19.77	18.0925	21.475	0.456074
rno-miR-223-3p	20.95	0	20.95	19.77	18.0925	21.475	0.456074
rno-miR-10b-3p	20.95	0	20.95	19.77	18.0925	18.724	0.522886
rno-miR-181c-3p	13.97	0	13.97	19.77	10.0655	18.724	0.285543
rno-miR-9b-3p	13.97	0	13.97	19.77	10.0655	18.724	0.285543
rno-miR-205	13.97	0	13.97	19.77	10.0655	18.724	0.285543
rno-miR-362-3p	13.97	0	13.97	19.77	10.0655	18.724	0.285543
rno-miR-146b-3p	13.97	0	13.97	19.77	10.0655	18.724	0.285543
rno-miR-672-5p	13.97	0	13.97	19.77	10.0655	18.724	0.285543
rno-miR-598-3p	6.98	0	0	19.77	0	18.724	0.198931
rno-miR-29c-5p	6.98	0	11.89	19.77	23.1694	18.724	0.018244
rno-miR-425-3p	6.98	0	0	19.77	23.1694	18.724	0.00246141
rno-miR-208a-3p	6.98	0	0	19.77	23.1694	18.724	0.00246141
rno-miR-350	6.98	0	0	19.77	23.1694	19.77	0.00199483
rno-miR-134-3p	0	0	0	19.77	23.1694	19.77	5.08135e-05
rno-miR-3074	0	0	0	19.77	23.1694	19.77	5.08135e-05
rno-miR-324-5p	0	0	0	19.77	0	19.77	0.116117
rno-miR-301b-3p	0	0	0	19.77	39.4135	19.77	0.0158734
rno-miR-1956-5p	0	0	0	19.77	39.4135	19.77	0.0158734
rno-miR-376c-3p	0	0	0	19.77	0	19.77	0.116117
rno-let-7c-1-3p	0	0	0	19.77	39.4135	19.77	0.0158734
rno-miR-379-3p	0	0	11.89	19.77	39.4135	19.77	0.0432146
rno-miR-200a-5p	0	0	0	19.77	39.4135	19.77	0.0158734
rno-miR-539-3p	0	0	11.89	19.77	39.4135	19.77	0.0432146
rno-miR-301a-3p	0	0	0	19.77	20.95	19.77	8.6665e-07
rno-miR-135a-3p	0	0	0	19.77	55.87	19.77	0.0574039
rno-miR-664-2-5p	0	0	0	19.77	48.89	19.77	0.0385249
rno-miR-376b-3p	0	0	0	19.77	19.77	19.77	#DIV/0!
rno-miR-702-3p	0	0	0	19.77	19.77	19.77	#DIV/0!
rno-miR-384-3p	0	0	0	19.77	0	19.77	0.116117
rno-miR-329-3p	0	0	0	19.77	19.77	19.77	#DIV/0!
rno-miR-3072	0	0	0	19.77	0	19.77	0.116117
rno-miR-380-3p	0	0	0	19.77	19.77	19.77	#DIV/0!
rno-miR-667-5p	0	0	0	19.77	19.77	19.77	#DIV/0!
rno-miR-217-5p	0	0	0	11.89	19.3195	11.89	0.00439154
rno-miR-452-3p	27.93	66.608	22.8934	0	0	0	0.0471204
rno-miR-132-5p	27.93	57.096	22.8934	0	0	0	0.0279332
rno-miR-301a-5p	6.98	47.576	6.98	0	0	0	0.20415
rno-miR-203a-3p	83.8	38.064	68.6885	0	0	0	0.00916332
rno-miR-466b-4-3p	27.94	38.064	22.9016	0	0	0	0.00265925
rno-miR-466b-2-3p	27.94	38.064	22.9016	0	0	0	0.00265925
rno-miR-15b-5p	27.93	28.544	22.8934	0	0	0	0.00012199
rno-miR-24-1-5p	27.93	28.544	22.8934	0	11.89	0	0.0066423
rno-miR-582-3p	13.97	28.544	11.4508	0	0	0	0.0278794
rno-miR-191a-3p	13.97	28.544	11.4508	0	0	0	0.0278794
rno-miR-342-5p	6.98	28.544	6.98	0	0	0	0.120023
rno-miR-127-5p	0	28.544	0	0	0	0	0.373901
rno-miR-142-3p	0	28.544	0	0	0	0	0.373901
rno-miR-340-3p	20.95	19.032	17.1721	0	0	0	6.30536e-05
rno-miR-148b-5p	13.97	19.032	11.4508	0	0	0	0.00265925
rno-miR-674-5p	0	19.032	0	0	0	0	0.373901
rno-miR-139-3p	0	19.032	0	0	0	23.79	0.883461
rno-miR-21-3p	0	19.032	0	0	0	0	0.373901
rno-miR-30d-3p	0	19.032	0	0	0	0	0.373901
rno-miR-3068-3p	27.93	9.512	22.8934	0	0	0	0.021589
rno-miR-181c-5p	20.95	9.512	17.1721	0	11.89	0	0.083695
rno-miR-31a-3p	13.97	9.512	11.4508	0	0	0	0.000835679
rno-miR-296-5p	6.98	9.512	6.98	0	0	0	0.000753084
rno-miR-6215	0	9.512	0	0	0	0	0.373901
rno-miR-369-5p	0	9.512	0	0	0	0	0.373901
rno-miR-15a-5p	0	9.512	0	0	0	0	0.373901
rno-miR-124-5p	0	9.512	0	0	0	0	0.373901
rno-miR-181a-2-3p	0	9.512	0	0	0	0	0.373901
rno-miR-3594-5p	0	9.512	0	0	0	0	0.373901
rno-miR-202-5p	0	9.512	0	0	0	0	0.373901
rno-miR-299a-5p	0	9.512	0	0	0	0	0.373901
rno-miR-7a-1-3p	0	9.512	0	0	0	0	0.373901
rno-miR-3064-5p	0	9.512	0	0	0	0	0.373901
rno-miR-871-5p	0	9.512	0	0	0	0	0.373901
rno-miR-3065-5p	0	9.512	11.89	0	0	0	0.121004
rno-miR-666-5p	0	9.512	0	0	0	0	0.373901
rno-miR-27b-5p	0	9.512	11.89	0	0	0	0.121004
rno-miR-381-3p	0	9.512	11.89	0	0	0	0.121004
rno-miR-193a-3p	34.92	0	28.623	0	0	0	0.120008
rno-miR-1843a-3p	20.95	0	17.1721	0	0	0	0.120008
rno-miR-136-5p	20.95	0	17.1721	0	0	0	0.120008
rno-miR-138-2-3p	13.97	0	11.4508	0	0	0	0.120008
rno-miR-298-3p	13.97	0	11.4508	0	0	0	0.120008
rno-miR-193b-3p	13.97	0	11.4508	0	0	0	0.120008
rno-miR-18a-3p	13.97	0	11.4508	0	0	0	0.120008
rno-miR-221-5p	13.97	0	11.4508	0	0	0	0.120008
rno-miR-19a-3p	13.97	0	11.4508	0	0	0	0.120008
rno-miR-223-5p	13.97	0	11.4508	0	0	0	0.120008
rno-miR-1839-3p	13.97	0	11.4508	0	0	0	0.120008
rno-miR-344a-3p	13.96	0	11.4426	0	0	0	0.120008
rno-miR-487b-5p	6.98	0	6.98	0	0	0	0.116117
rno-miR-130a-5p	6.98	0	6.98	0	0	0	0.116117
rno-miR-450a-3p	6.98	0	6.98	0	0	0	0.116117
rno-miR-5132-5p	6.98	0	6.98	0	0	0	0.116117
rno-miR-128-1-5p	6.98	0	6.98	0	0	0	0.116117
rno-miR-106b-5p	6.98	0	6.98	0	0	0	0.116117
rno-miR-193a-5p	6.98	0	6.98	0	0	0	0.116117
rno-miR-135b-5p	6.98	0	6.98	0	0	0	0.116117
rno-miR-98-3p	6.98	0	6.98	0	0	0	0.116117
rno-miR-3542	6.98	0	6.98	0	0	0	0.116117
rno-miR-34a-3p	6.98	0	6.98	0	0	0	0.116117
rno-miR-376a-3p	6.98	0	6.98	0	0	0	0.116117
rno-miR-376a-5p	6.98	0	6.98	0	0	0	0.116117
rno-miR-702-5p	6.98	0	6.98	0	0	0	0.116117
rno-miR-3102	6.98	0	6.98	0	0	0	0.116117
rno-miR-877	6.98	0	6.98	0	0	0	0.116117
rno-let-7f-2-3p	6.98	0	6.98	0	0	0	0.116117
rno-miR-322-5p	6.98	0	6.98	0	0	0	0.116117
rno-miR-743b-3p	6.98	0	6.98	0	0	0	0.116117
rno-miR-374-3p	6.98	0	6.98	0	0	0	0.116117
rno-miR-295-3p	0	0	0	0	0	0
rno-miR-363-5p	0	0	0	0	0	0
rno-miR-483-5p	0	0	0	0	0	0
rno-miR-31b	0	0	0	0	0	0
rno-miR-883-3p	0	0	0	0	0	0
rno-miR-496-3p	0	0	0	0	0	0
rno-miR-380-5p	0	0	0	0	0	0
rno-miR-344i	0	0	0	0	0	0
rno-miR-3575	0	0	0	0	0	0
rno-miR-3572	0	0	0	0	0	0
rno-miR-6331	0	0	0	0	0	0
rno-miR-185-3p	0	0	0	0	0	0
rno-miR-6317	0	0	0	0	0	0
rno-miR-290	0	0	0	0	0	0
rno-miR-540-3p	0	0	0	0	0	0
rno-miR-3596a	0	0	0	0	0	0
rno-miR-181d-3p	0	0	0	0	0	0
rno-miR-6330	0	0	0	0	0	0
rno-miR-879-5p	0	0	0	0	0	0
rno-miR-224-3p	0	0	0	0	0	0
rno-miR-880-5p	0	0	0	0	0	0
rno-miR-291a-5p	0	0	0	0	0	0
rno-miR-3595	0	0	0	0	0	0
rno-miR-299b-5p	0	0	0	0	0	0
rno-miR-3557-5p	0	0	0	0	0	0
rno-miR-3084a-3p	0	0	0	0	0	0
rno-miR-20b-3p	0	0	0	0	0	0
rno-miR-293-3p	0	0	0	0	0	0
rno-miR-497-3p	0	0	0	0	0	0
rno-miR-211-3p	0	0	0	0	0	0
rno-miR-3591	0	0	0	0	0	0
rno-miR-29a-5p	0	0	0	0	0	0
rno-miR-203a-5p	0	0	0	0	0	0
rno-miR-384-5p	0	0	0	0	0	0
rno-miR-883-5p	0	0	0	0	0	0
rno-miR-344a-5p	0	0	0	0	0	0
rno-miR-25-5p	0	0	0	0	0	0
rno-let-7a-2-3p	0	0	0	0	0	0
rno-miR-325-3p	0	0	0	0	0	0
rno-miR-463-3p	0	0	0	0	0	0
rno-miR-741-5p	0	0	0	0	0	0
rno-miR-343	0	0	0	0	0	0
rno-miR-183-3p	0	0	0	0	0	0
rno-miR-3099	0	0	0	0	0	0
rno-miR-1188-5p	0	0	0	0	0	0
rno-miR-92b-5p	0	0	0	0	0	0
rno-miR-3084c-3p	0	0	0	0	0	0
rno-miR-3583-3p	0	0	0	0	0	0
rno-miR-592	0	0	0	0	0	0
rno-miR-1193-3p	0	0	0	0	0	0
rno-miR-1193-5p	0	0	0	0	0	0
rno-miR-1949	0	0	0	0	0	0
rno-miR-103-1-5p	0	0	0	0	0	0
rno-miR-6319	0	0	0	0	0	0
rno-miR-147	0	0	0	0	0	0
rno-miR-154-3p	0	0	0	0	0	0
rno-miR-3085	0	0	0	0	0	0
rno-miR-433-5p	0	0	0	0	0	0
rno-miR-3566	0	0	0	0	0	0
rno-miR-3084d	0	0	0	0	0	0
rno-miR-218b	0	0	0	0	0	0
rno-miR-3596d	0	0	0	0	0	0
rno-miR-770-3p	0	0	0	0	0	0
rno-miR-3577	0	0	0	0	0	0
rno-miR-488-3p	0	0	0	0	0	0
rno-miR-3556a	0	0	0	0	0	0
rno-miR-100-3p	0	0	0	0	0	0
rno-miR-181b-2-3p	0	0	0	0	0	0
rno-miR-30b-3p	0	0	0	0	0	0
rno-let-7e-3p	0	0	0	0	0	0
rno-miR-201-5p	0	0	0	0	0	0
rno-miR-466d	0	0	0	0	0	0
rno-miR-881-5p	0	0	0	0	0	0
rno-miR-3586-5p	0	0	0	0	0	0
rno-miR-547-3p	0	0	0	0	0	0
rno-miR-551b-5p	0	0	0	0	0	0
rno-miR-667-3p	0	0	0	0	0	0
rno-miR-547-5p	0	0	0	0	0	0
rno-miR-291b	0	0	0	0	0	0
rno-miR-1199-5p	0	0	0	0	0	0
rno-miR-3558-3p	0	0	0	0	0	0
rno-miR-93-3p	0	0	0	0	0	0
rno-miR-409b	0	0	0	0	0	0
rno-miR-3587	0	0	0	0	0	0
rno-miR-3596b	0	0	0	0	0	0
rno-miR-295-5p	0	0	0	0	0	0
rno-miR-761	0	0	0	0	0	0
rno-miR-6320	0	0	0	0	0	0
rno-miR-802-3p	0	0	0	0	0	0
rno-miR-3594-3p	0	0	0	0	0	0
rno-miR-6318	0	0	0	0	0	0
rno-miR-3585-3p	0	0	0	0	0	0
rno-miR-33-3p	0	0	0	0	0	0
rno-miR-6326	0	0	0	0	0	0
rno-miR-30c-1-3p	0	0	0	0	0	0
rno-miR-194-3p	0	0	0	0	0	0
rno-miR-141-3p	0	0	0	0	0	0
rno-miR-509-3p	0	0	0	0	0	0
rno-miR-673-3p	0	0	0	0	0	0
rno-miR-327	0	0	0	0	0	0
rno-miR-543-5p	0	0	0	0	0	0
rno-miR-3568	0	0	0	0	0	11.89
rno-miR-128-2-5p	0	0	0	0	0	0
rno-miR-568	0	0	0	0	0	0
rno-miR-6334	0	0	0	0	0	0
rno-miR-190a-5p	0	0	0	0	0	0
rno-miR-192-3p	0	0	0	0	0	0
rno-miR-1843b-3p	0	0	0	0	0	0
rno-miR-196a-3p	0	0	0	0	0	0
rno-miR-1306-5p	0	0	0	0	0	0
rno-miR-328a-5p	0	0	0	0	0	0
rno-miR-218a-2-3p	0	0	0	0	0	0
rno-miR-99a-3p	0	0	0	0	0	0
rno-miR-3561-5p	0	0	0	0	0	0
rno-miR-292-3p	0	0	0	0	0	0
rno-miR-1224	0	0	0	0	0	0
rno-miR-6322	0	0	0	0	0	0
rno-miR-9b-5p	0	0	0	0	0	0
rno-miR-346	0	0	0	0	0	0
rno-miR-3560	0	0	0	0	0	0
rno-miR-1896	0	0	0	0	0	0
rno-miR-490-5p	0	0	0	0	0	0
rno-miR-666-3p	0	0	0	0	0	0
rno-miR-672-3p	0	0	0	0	0	0
rno-miR-3556b	0	0	0	0	0	0
rno-miR-3547	0	0	0	0	0	0
rno-miR-202-3p	0	0	0	0	0	0
rno-miR-29b-1-5p	0	0	0	0	0	0
rno-miR-133b-5p	0	0	0	0	0	0
rno-miR-3558-5p	0	0	0	0	0	0
rno-miR-187-5p	0	0	0	0	0	0
rno-miR-92a-1-5p	0	0	0	0	0	0
rno-miR-449a-3p	0	0	0	0	0	0
rno-miR-741-3p	0	0	0	0	0	0
rno-miR-3562	0	0	0	0	0	0
rno-miR-5132-3p	0	0	0	0	0	0
rno-miR-376c-5p	0	0	0	0	0	0
rno-miR-208b-5p	0	0	0	0	0	0
rno-miR-3580-3p	0	0	0	0	0	0
rno-miR-1912-5p	0	0	0	0	0	0
rno-miR-23b-5p	0	0	0	0	0	0
rno-miR-377-5p	0	0	0	0	0	0
rno-miR-3593-5p	0	0	0	0	0	0
rno-miR-23a-5p	0	0	0	0	0	0
rno-miR-509-5p	0	0	0	0	0	0
rno-miR-6332	0	0	0	0	0	0
rno-miR-126b	0	0	0	0	0	0
rno-miR-344b-5p	0	0	0	0	0	0
rno-miR-3588	0	0	0	0	0	0
rno-miR-3541	0	0	0	0	0	0
rno-miR-421-5p	0	0	0	0	0	0
rno-miR-137-3p	0	0	0	0	0	0
rno-miR-190b-5p	0	0	0	0	0	0
rno-miR-3064-3p	0	0	0	0	0	0
rno-miR-759	0	0	0	0	0	0
rno-miR-326-5p	0	0	0	0	0	0
rno-miR-7a-2-3p	0	0	0	0	0	0
rno-miR-190a-3p	0	0	0	0	0	0
rno-miR-3084a-5p	0	0	0	0	0	0
rno-miR-19b-2-5p	0	0	0	0	0	0
rno-miR-711	0	0	0	0	0	0
rno-miR-3551-5p	0	0	0	0	0	0
rno-miR-3586-3p	0	0	0	0	0	0
rno-miR-3584-3p	0	0	0	0	0	0
rno-miR-297	0	0	0	0	0	0
rno-miR-196c-5p	0	0	0	0	0	0
rno-miR-376b-5p	0	0	0	0	0	0
rno-miR-6323	0	0	0	0	0	0
rno-miR-489-3p	0	0	0	0	0	0
rno-miR-3584-5p	0	0	0	0	0	0
rno-miR-539-5p	0	0	0	0	0	0
rno-miR-876	0	0	0	0	0	0
rno-miR-582-5p	0	0	0	0	0	0
rno-miR-323-5p	0	0	0	0	0	0
rno-miR-3574	0	0	0	0	0	0
rno-miR-3553	0	0	0	0	0	0
rno-miR-181b-1-3p	0	0	0	0	0	0
rno-miR-3543	0	0	0	0	0	0
rno-miR-3075	0	0	0	0	0	0
rno-miR-10a-3p	0	0	0	0	0	0
rno-miR-101a-5p	0	0	0	0	0	0
rno-miR-344g	0	0	0	0	0	0
rno-miR-3571	0	0	0	0	0	0
rno-miR-188-5p	0	0	0	0	0	0
rno-miR-154-5p	0	0	0	0	0	0
rno-miR-678	0	0	0	0	0	0
rno-miR-873-5p	0	0	0	0	0	0
rno-miR-26a-3p	0	0	0	0	0	0
rno-miR-465-5p	0	0	0	0	0	0
rno-miR-1247-5p	0	0	0	0	0	0
rno-miR-3544	0	0	0	0	0	0
rno-miR-743a-3p	0	0	0	0	0	0
rno-miR-881-3p	0	0	0	0	0	0
rno-miR-1956-3p	0	0	0	0	0	0
rno-miR-349	0	0	0	0	0	0
rno-miR-3569	0	0	0	0	0	0
rno-miR-541-3p	0	0	0	0	0	0
rno-miR-3592	0	0	0	0	0	0
rno-miR-19b-1-5p	0	0	0	0	0	0
rno-miR-3065-3p	0	0	0	0	0	0
rno-miR-150-3p	0	0	0	0	0	0
rno-miR-1-5p	0	0	0	0	0	0
rno-miR-188-3p	0	0	0	0	0	0
rno-miR-344b-3p	0	0	0	0	0	0
rno-miR-133a-5p	0	0	0	0	0	0
rno-miR-6327	0	0	0	0	0	35.68
rno-miR-2985	0	0	0	0	0	0
rno-miR-210-5p	0	0	0	0	0	0
rno-miR-6315	0	0	0	0	0	0
rno-miR-3590-3p	0	0	0	0	0	0
rno-miR-216a-3p	0	0	0	0	0	0
rno-miR-375-5p	0	0	0	0	0	0
rno-miR-3550	0	0	0	0	0	0
rno-miR-6325	0	0	0	0	0	0
rno-miR-675-5p	0	0	0	0	0	0
rno-miR-122-3p	0	0	0	0	0	0
rno-miR-758-3p	0	0	0	0	0	0
rno-miR-32-3p	0	0	0	0	0	0
rno-miR-874-5p	0	0	0	0	0	0
rno-miR-879-3p	0	0	0	0	0	0
rno-miR-3585-5p	0	0	0	0	0	0
rno-miR-301b-5p	0	0	0	0	0	0
rno-miR-3578	0	0	0	0	0	0
rno-miR-135b-3p	0	0	0	0	0	0
rno-miR-742-5p	0	0	0	0	0	0
rno-miR-16-3p	0	0	0	0	0	0
rno-miR-3551-3p	0	0	0	0	0	0
rno-miR-494-5p	0	0	0	0	0	11.89
rno-miR-291a-3p	0	0	0	0	0	0
rno-miR-471-5p	0	0	0	0	0	0
rno-miR-544-3p	0	0	0	0	0	0
rno-miR-141-5p	0	0	0	0	0	0
rno-miR-105	0	0	0	0	0	0
rno-miR-3596c	0	0	0	0	0	0
rno-miR-615	0	0	0	0	0	0
rno-miR-218a-1-3p	0	0	0	0	0	0
rno-miR-96-3p	0	0	0	0	0	11.89
rno-miR-449c-3p	0	0	0	0	0	0
rno-miR-29b-5p	0	0	0	0	0	0
rno-miR-6314	0	0	0	0	0	0
rno-miR-216b-5p	0	0	0	0	0	0
rno-miR-511-5p	0	0	0	0	0	0
rno-miR-17-2-3p	0	0	0	0	0	0
rno-miR-337-3p	0	0	0	0	0	0
rno-miR-758-5p	0	0	0	0	0	0
rno-miR-762	0	0	0	0	0	0
rno-miR-92a-2-5p	0	0	0	0	0	0
rno-miR-331-5p	0	0	0	0	0	0
rno-miR-551b-3p	0	0	0	0	0	0
rno-miR-500-3p	0	0	0	0	0	0
rno-miR-3579	0	0	0	0	0	0
rno-miR-1199-3p	0	0	23.79	0	0	0
rno-miR-347	0	0	0	0	0	0
rno-miR-802-5p	0	0	0	0	0	0
rno-miR-294	0	0	0	0	0	0
rno-miR-293-5p	0	0	0	0	0	0
rno-miR-770-5p	0	0	0	0	0	0
rno-miR-760-5p	0	0	0	0	0	0
rno-miR-488-5p	0	0	0	0	0	0
rno-miR-935	0	0	0	0	0	0
rno-miR-673-5p	0	0	0	0	0	0
rno-miR-153-3p	0	0	0	0	0	0
rno-miR-196c-3p	0	0	0	0	0	0
rno-miR-144-3p	0	0	0	0	0	0
rno-miR-320-5p	0	0	0	0	0	0
rno-miR-3120	0	0	0	0	0	0
rno-miR-449c-5p	0	0	0	0	0	0
rno-miR-383-3p	0	0	0	0	0	0
rno-miR-471-3p	0	0	0	0	0	0
rno-miR-3583-5p	0	0	0	0	0	0
rno-miR-675-3p	0	0	0	0	0	0
rno-miR-1912-3p	0	0	0	0	0	0
rno-miR-3552	0	0	0	0	0	0
rno-miR-3576	0	0	0	0	0	0
rno-miR-743a-5p	0	0	0	0	0	0
rno-miR-20a-3p	0	0	0	0	0	0
rno-miR-1297	0	0	0	0	11.89	0
rno-miR-3593-3p	0	0	0	0	0	0
rno-miR-137-5p	0	0	0	0	0	0
rno-miR-107-5p	0	0	0	0	0	0
rno-miR-219b	0	0	0	0	0	0
rno-miR-544-5p	0	0	0	0	0	0
rno-miR-489-5p	0	0	0	0	0	0
rno-miR-3580-5p	0	0	0	0	0	0
rno-miR-496-5p	0	0	0	0	0	0
rno-miR-653-3p	0	0	0	0	0	0
rno-miR-540-5p	0	0	0	0	0	0
rno-miR-15a-3p	0	0	0	0	0	0
rno-miR-191b	0	0	0	0	0	0
rno-miR-200b-5p	0	0	0	0	0	0
rno-miR-381-5p	0	0	0	0	0	0
rno-miR-133c	0	0	0	0	0	0
rno-miR-3564	0	0	0	0	0	0
rno-miR-216b-3p	0	0	0	0	0	0
rno-miR-33-5p	0	0	0	0	0	0
rno-miR-3557-3p	0	0	0	0	0	0
rno-miR-3590-5p	0	0	0	0	0	0
rno-miR-465-3p	0	0	0	0	0	0
rno-miR-155-3p	0	0	0	0	0	0
rno-miR-336-3p	0	0	0	0	0	0
rno-miR-138-1-3p	0	0	0	0	0	0
rno-miR-214-5p	0	0	0	0	0	0
rno-miR-101b-5p	0	0	0	0	23.79	0
rno-miR-149-3p	0	0	0	0	0	0
rno-miR-208a-5p	0	0	0	0	0	0
rno-miR-1247-3p	0	0	0	0	0	0
rno-miR-207	0	0	0	0	0	0
rno-miR-632	0	0	0	0	0	0
rno-miR-3561-3p	0	0	0	0	0	23.79
rno-miR-499-3p	0	0	0	0	0	0
rno-miR-6333	0	0	0	0	0	0
rno-miR-875	0	0	0	0	0	0
rno-miR-345-5p	0	0	0	0	0	0
rno-miR-219a-5p	0	0	0	0	0	0
rno-miR-652-5p	0	0	0	0	0	0
rno-miR-742-3p	0	0	0	0	0	0
rno-miR-292-5p	0	0	0	0	0	0
rno-let-7i-3p	0	0	0	0	0	0
rno-miR-598-5p	0	0	0	0	0	0
rno-miR-653-5p	0	0	0	0	0	0
rno-miR-449a-5p	0	0	0	0	0	0
rno-miR-219a-1-3p	0	0	0	0	0	0
rno-miR-328b-3p	0	0	0	0	0	0
rno-miR-200c-5p	0	0	0	0	0	0
rno-miR-743b-5p	0	0	0	0	0	0
rno-miR-26b-3p	0	0	0	0	0	0
rno-miR-483-3p	0	0	0	0	0	0
rno-miR-153-5p	0	0	0	0	0	0
rno-miR-3084b-3p	0	0	0	0	0	0
rno-miR-664-1-5p	0	0	0	0	0	0
rno-miR-7578	0	0	0	0	0	0
rno-miR-511-3p	0	0	0	0	0	0
rno-miR-203b-5p	0	0	0	0	0	0
rno-miR-764-3p	0	0	0	0	0	0
rno-miR-3570	0	0	0	0	0	0
rno-miR-451-3p	0	0	0	0	0	0
rno-miR-463-5p	0	0	0	0	11.89	0
rno-miR-448-5p	0	0	0	0	0	0
rno-miR-3546	0	0	0	0	0	0
rno-miR-344b-1-3p	0	0	0	0	0	0
rno-miR-3573-3p	0	0	0	0	0	0
rno-miR-186-3p	0	0	0	0	0	0
rno-miR-878	0	0	0	0	0	0
rno-miR-362-5p	0	0	0	0	0	0
rno-miR-17-1-3p	0	0	0	0	0	0
rno-miR-764-5p	0	0	0	0	0	0
rno-miR-352	0	0	0	0	0	0
rno-miR-377-3p	0	0	0	0	0	0
rno-miR-431	0	0	0	0	0	0
rno-miR-196b-3p	0	0	0	0	0	0
rno-miR-412-3p	0	0	0	0	0	23.79
rno-miR-201-3p	0	0	0	0	0	0
rno-miR-300-5p	0	0	0	0	0	0
rno-miR-19a-5p	0	0	0	0	0	0
rno-miR-325-5p	0	0	0	0	0	0
rno-miR-216a-5p	0	0	23.79	0	0	0
rno-miR-665	0	0	0	0	0	0
rno-miR-501-5p	0	0	0	0	0	0
rno-miR-679	0	0	0	0	0	0
rno-miR-3549	0	0	0	0	0	0
rno-miR-6216	0	0	0	0	0	0
rno-miR-500-5p	0	0	0	0	11.89	11.89
rno-miR-3589	0	0	0	0	0	0
rno-miR-103-2-5p	0	0	0	0	0	0
rno-miR-880-3p	0	0	0	0	0	0
rno-miR-146a-3p	0	0	0	0	0	0
rno-miR-190b-3p	0	0	0	0	0	0
rno-miR-410-5p	0	0	0	0	0	0
rno-miR-206-5p	0	0	0	0	0	0
rno-miR-217-3p	0	0	0	0	0	0
rno-miR-336-5p	0	0	0	0	0	0
rno-miR-6316	0	0	0	0	0	0
rno-miR-3573-5p	0	0	0	0	0	0
rno-miR-6321	0	0	0	0	0	0
rno-miR-871-3p	0	0	0	0	0	0
rno-miR-873-3p	0	0	0	0	0	0
rno-miR-18a-5p	0	0	0	0	0	0
rno-miR-370-5p	0	0	0	0	0	0
rno-miR-505-5p	0	0	0	0	0	0
rno-miR-3548	0	0	0	0	0	0
rno-miR-1188-3p	0	0	0	0	0	0
